# Supplementary figures and images for: ADAR1 is essential for intestinal homeostasis and stem cell maintenance
Source: PubMed Central journal article supplement — Cell Death Dis. 2013 Apr 18;4(4):e599–. doi: 10.1038/cddis.2013.125 (PMC3641348; doi:10.1038/cddis.2013.125), 2013-04-18

**A**

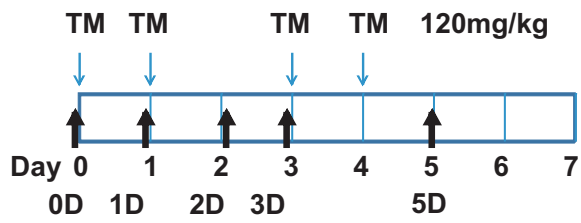

**B**

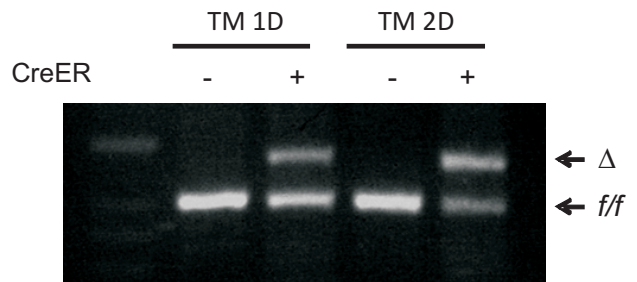

**C**

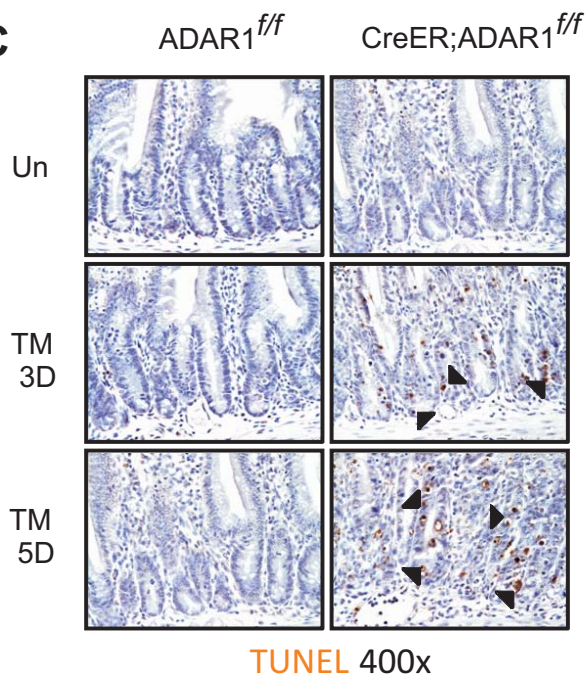

**D**

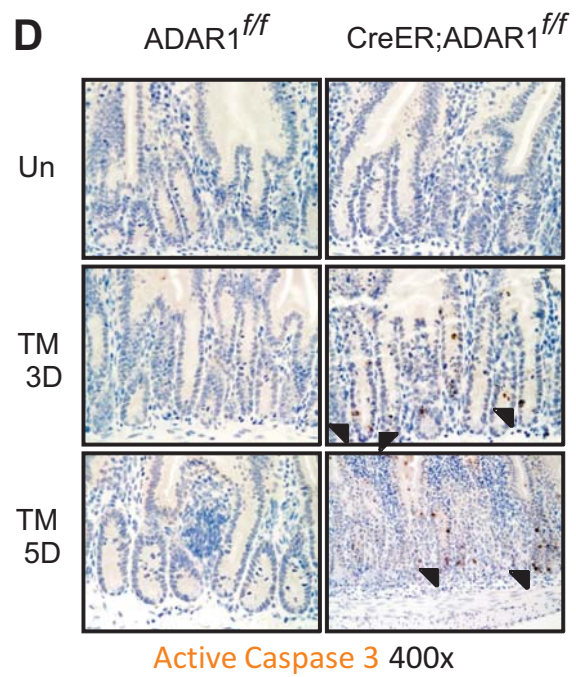

**E**

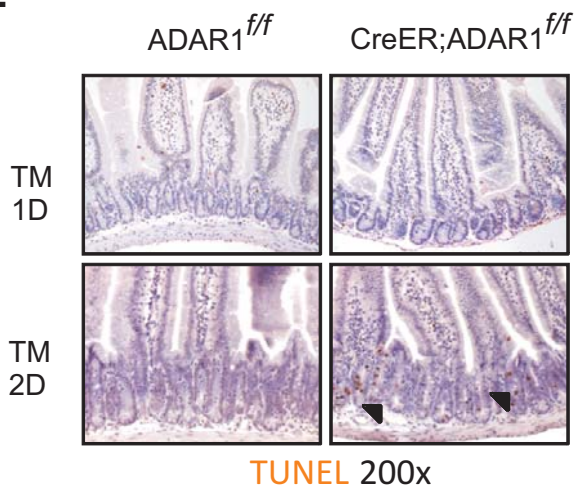

**F**

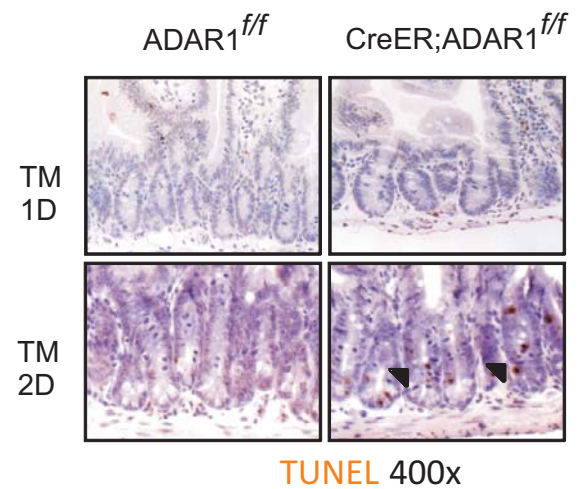

**A**

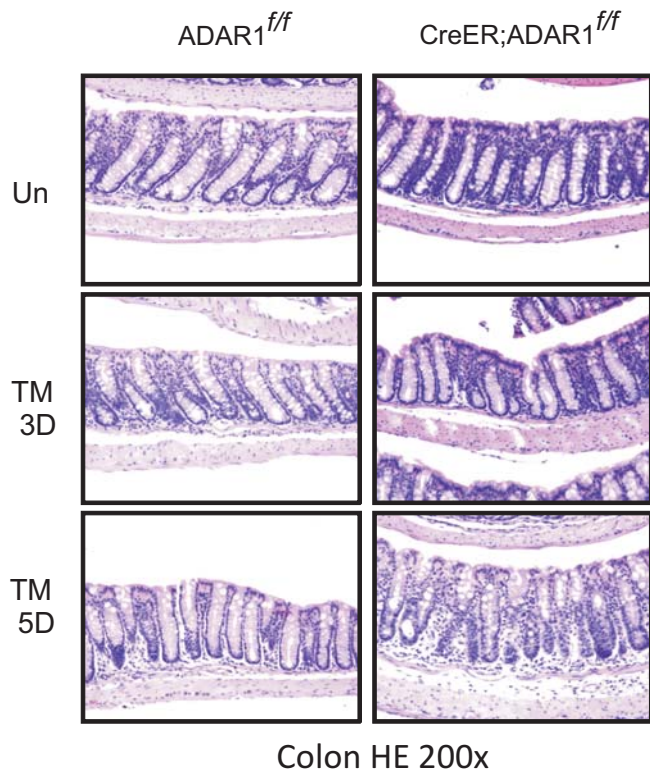

**B**

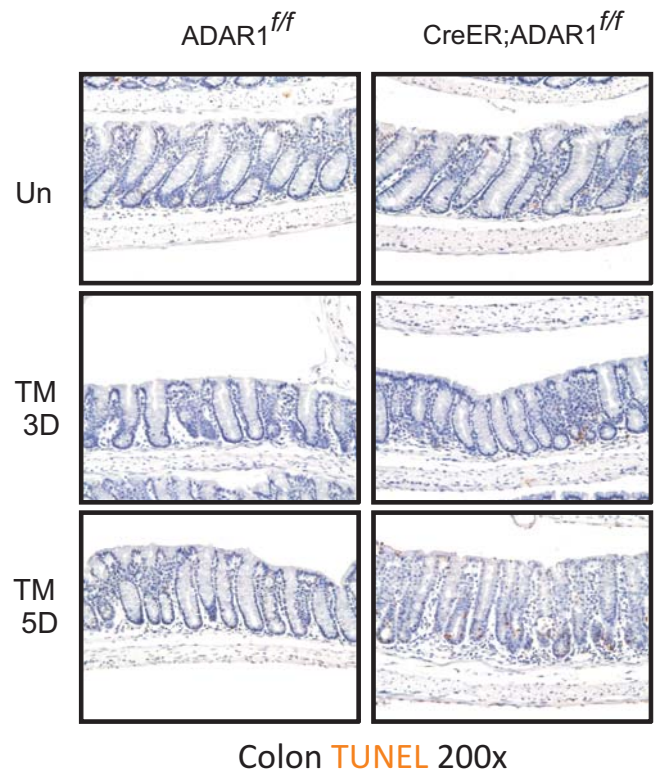

**C**

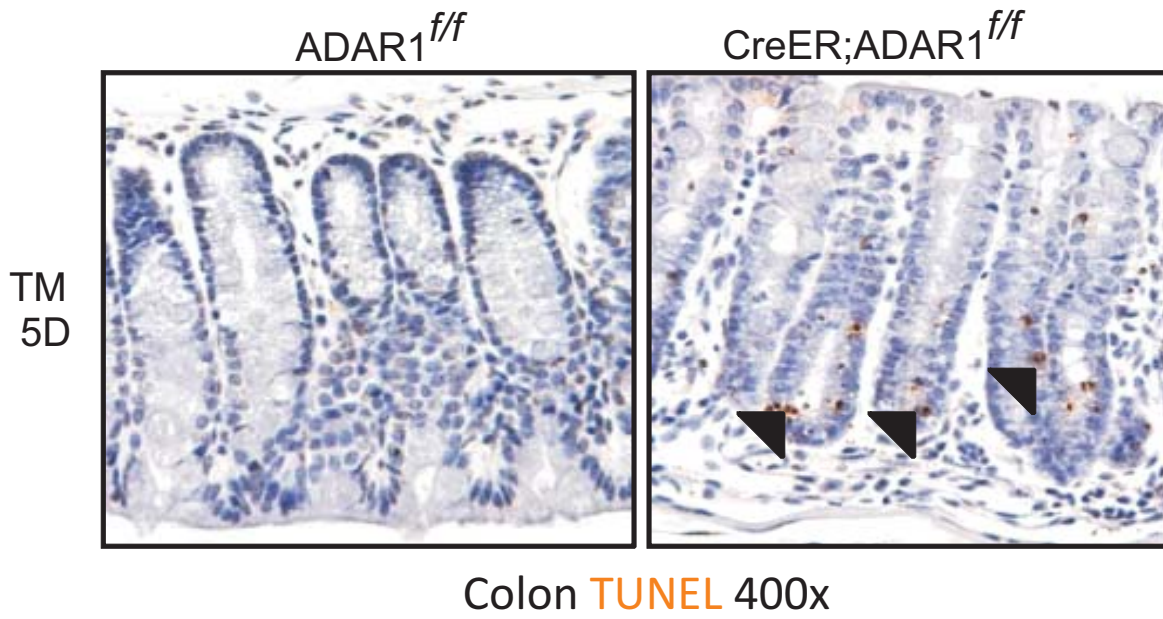

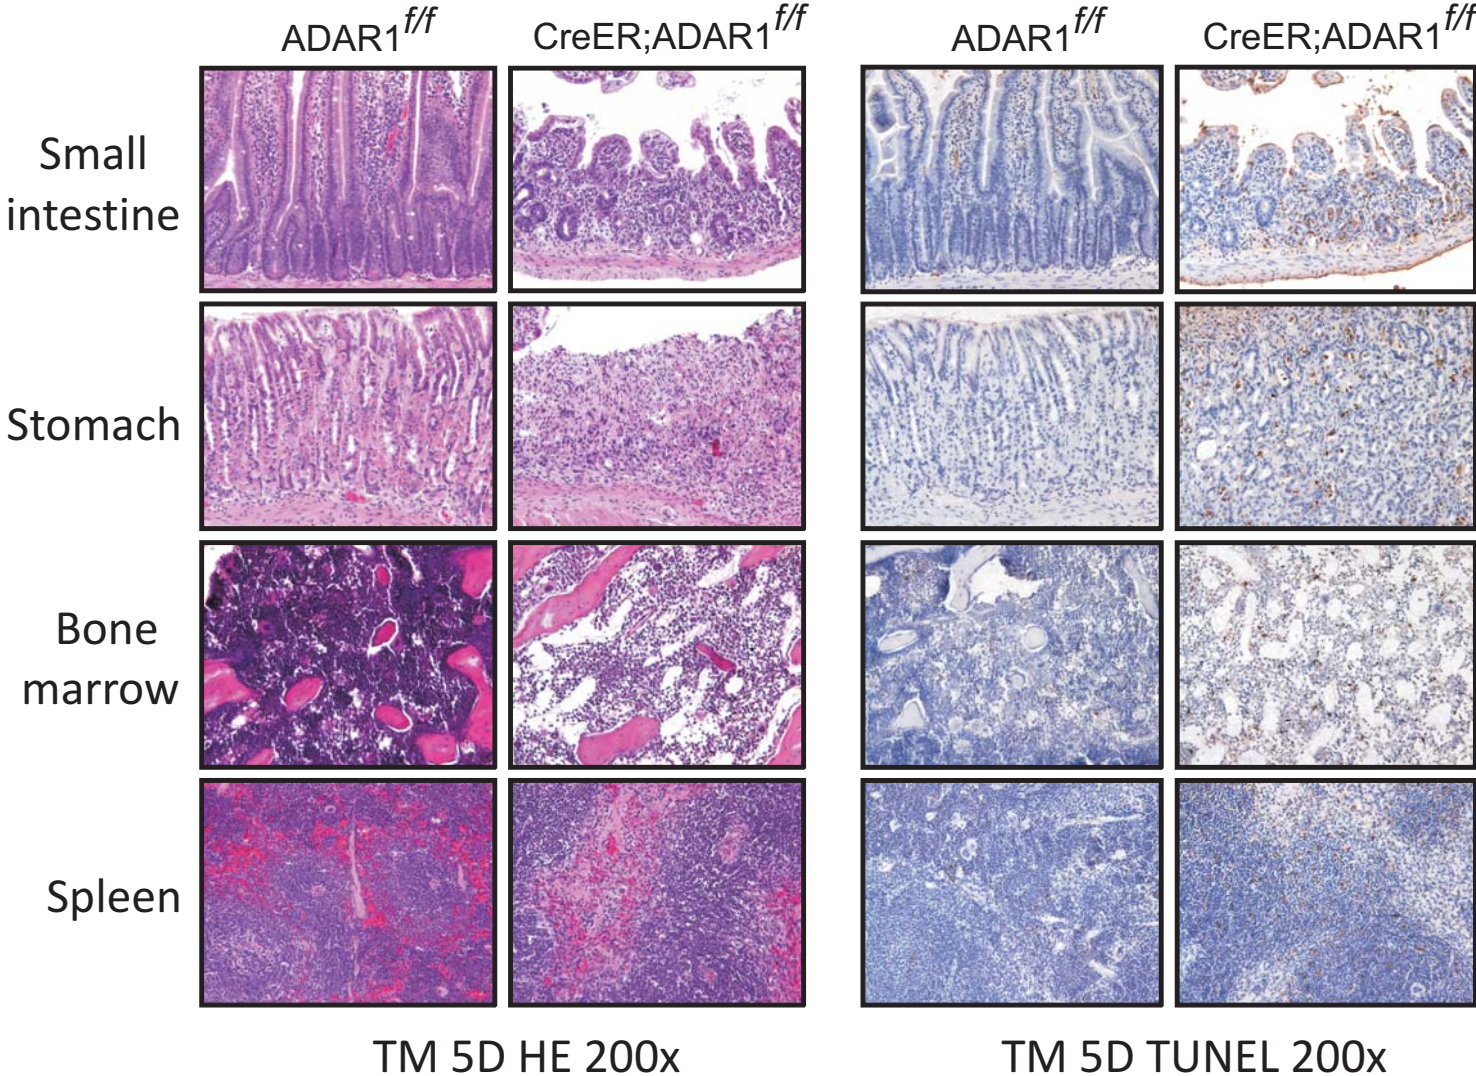

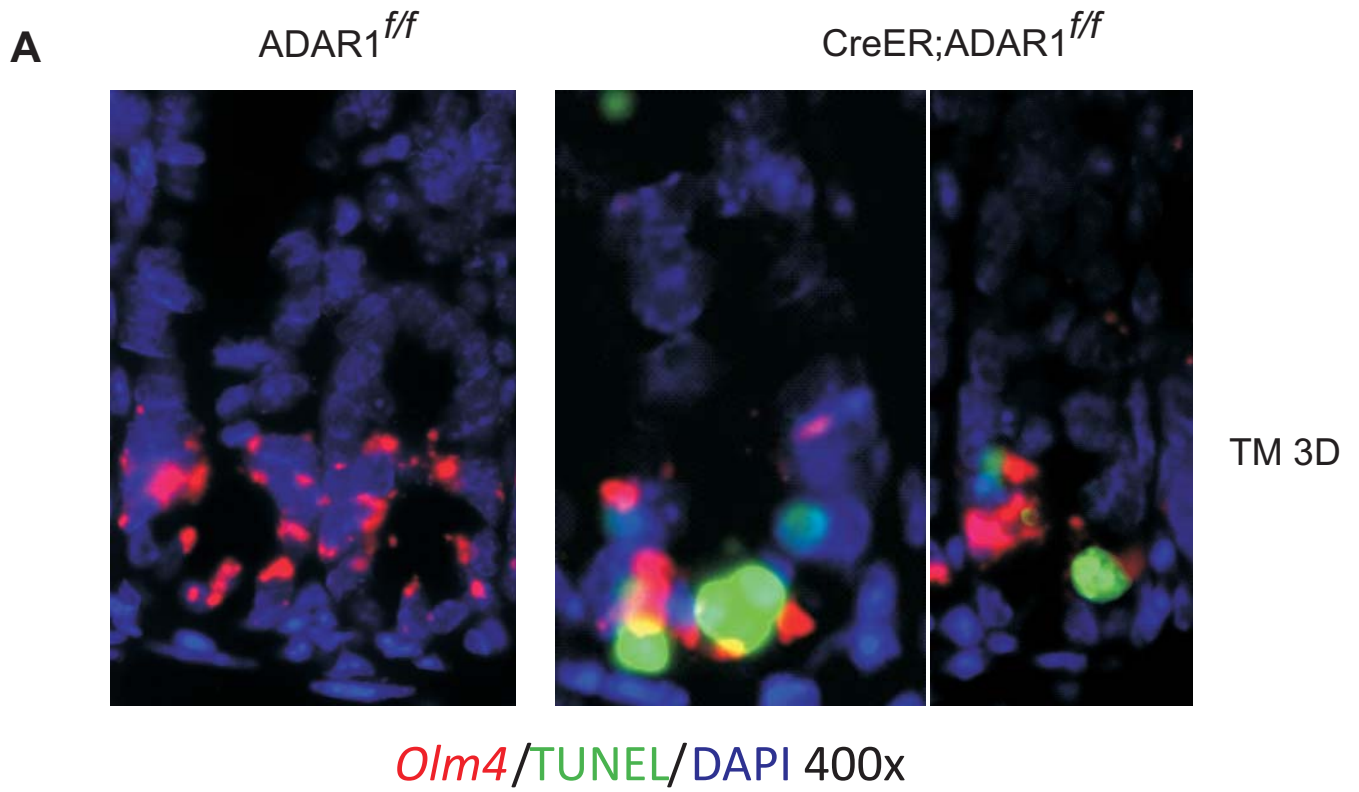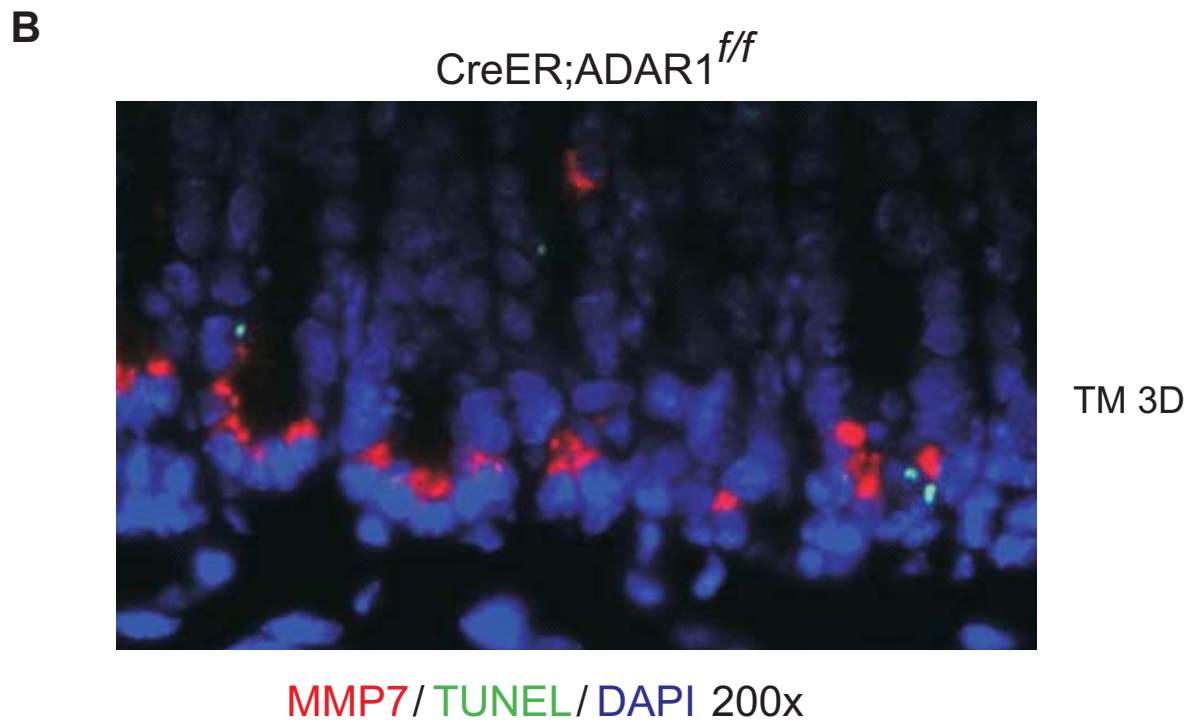

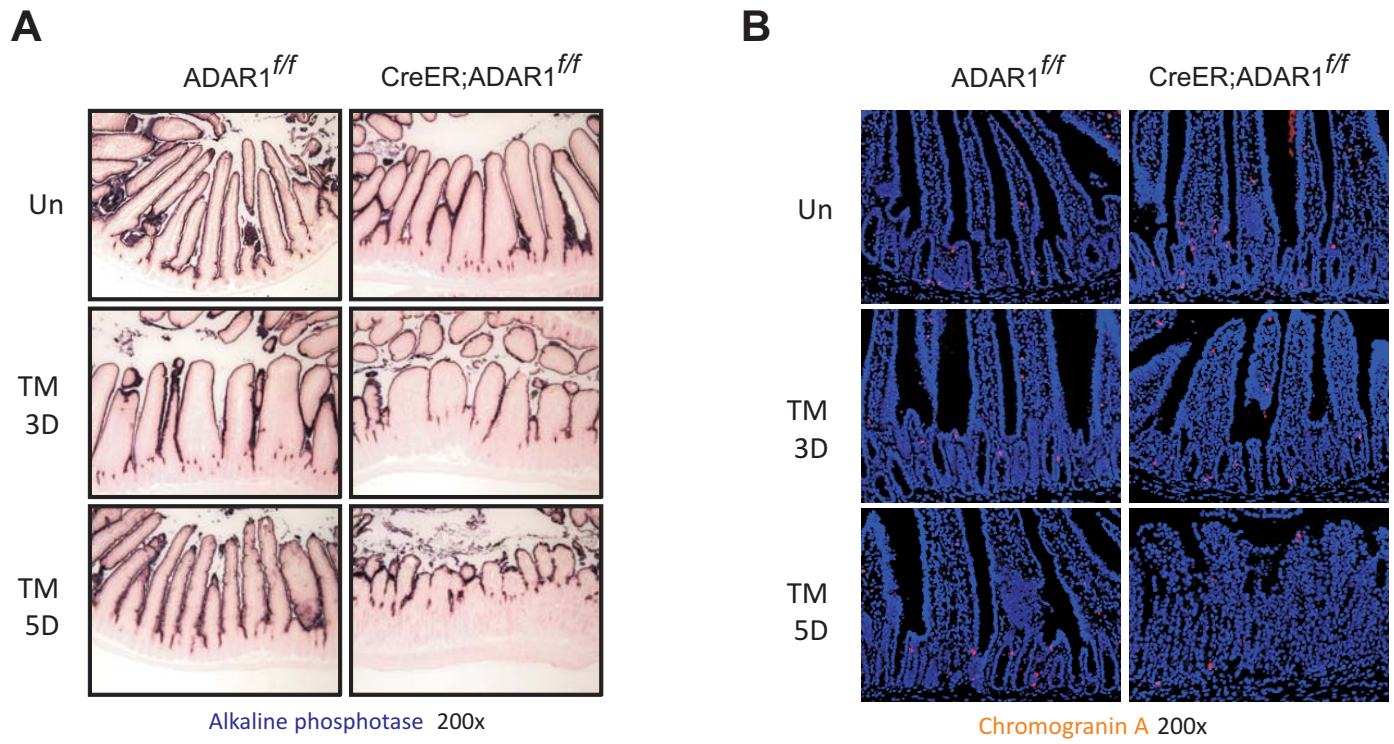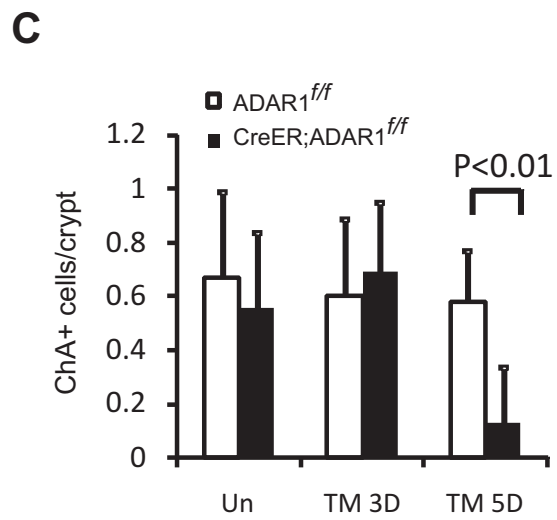

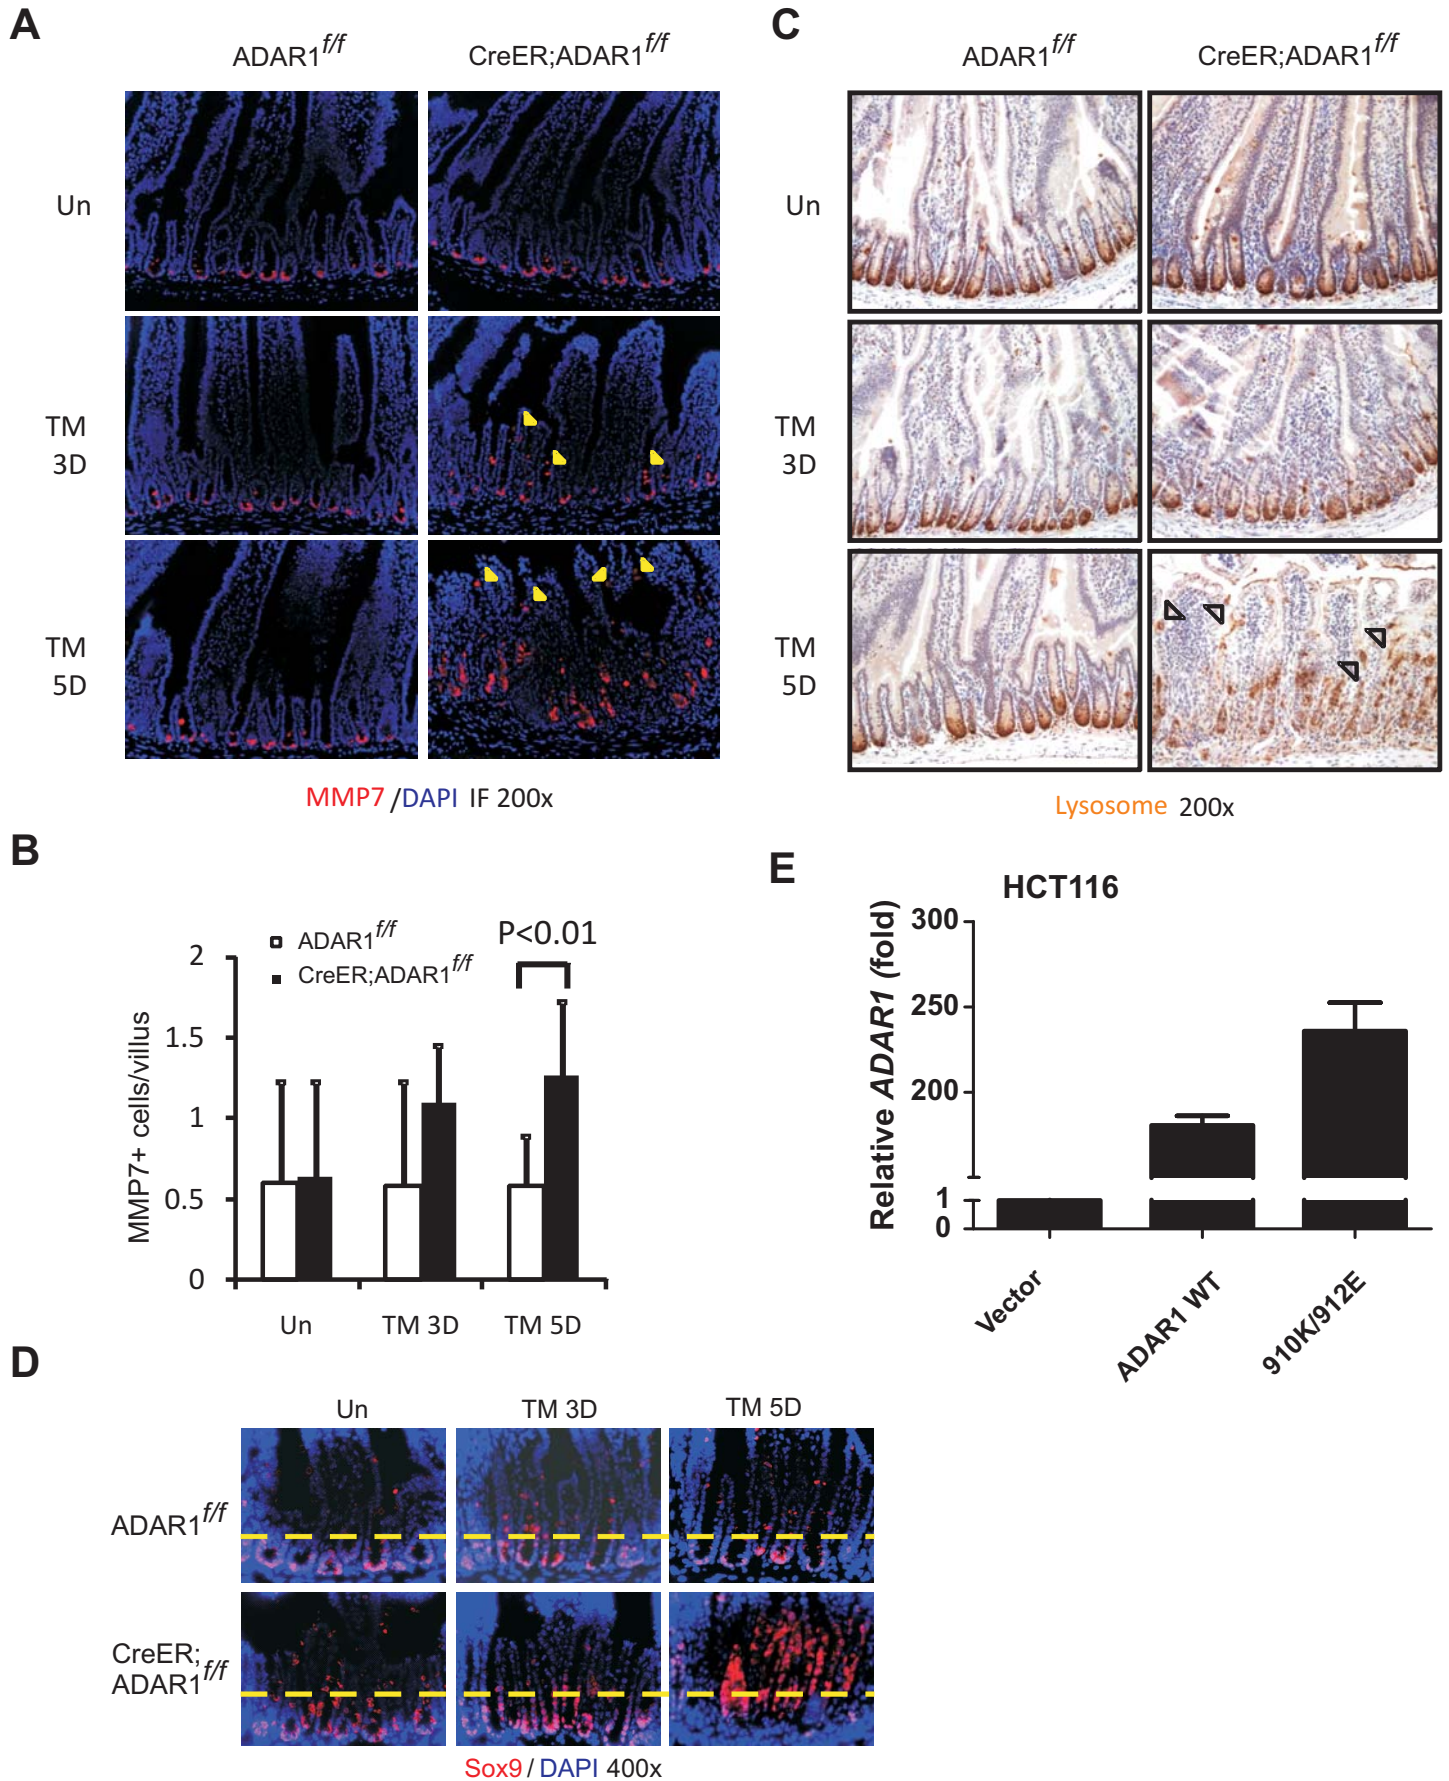

Qiu *et al.* Fig. S7 Related to Fig 4

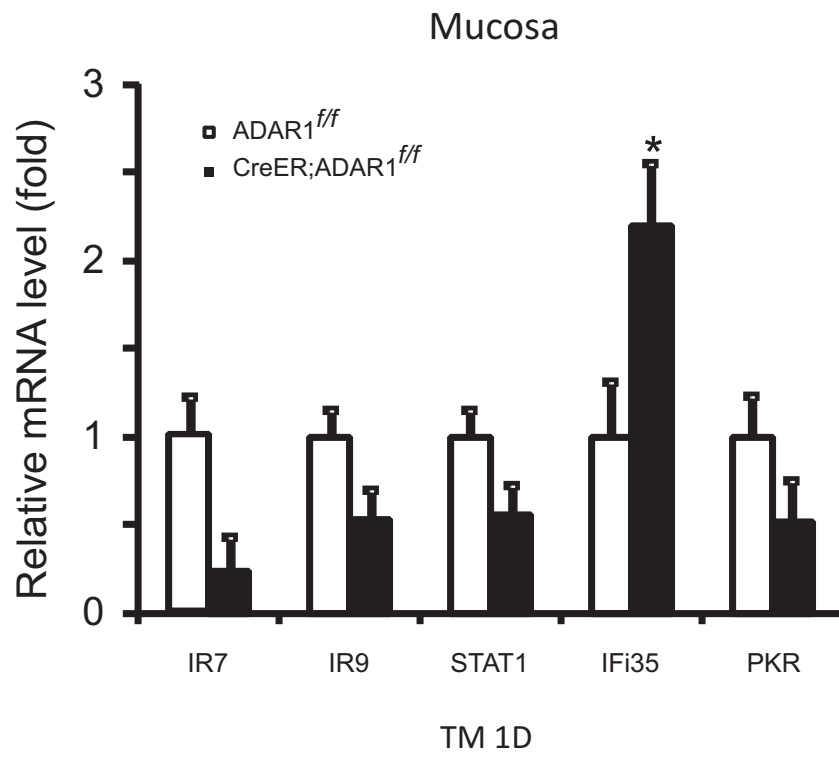

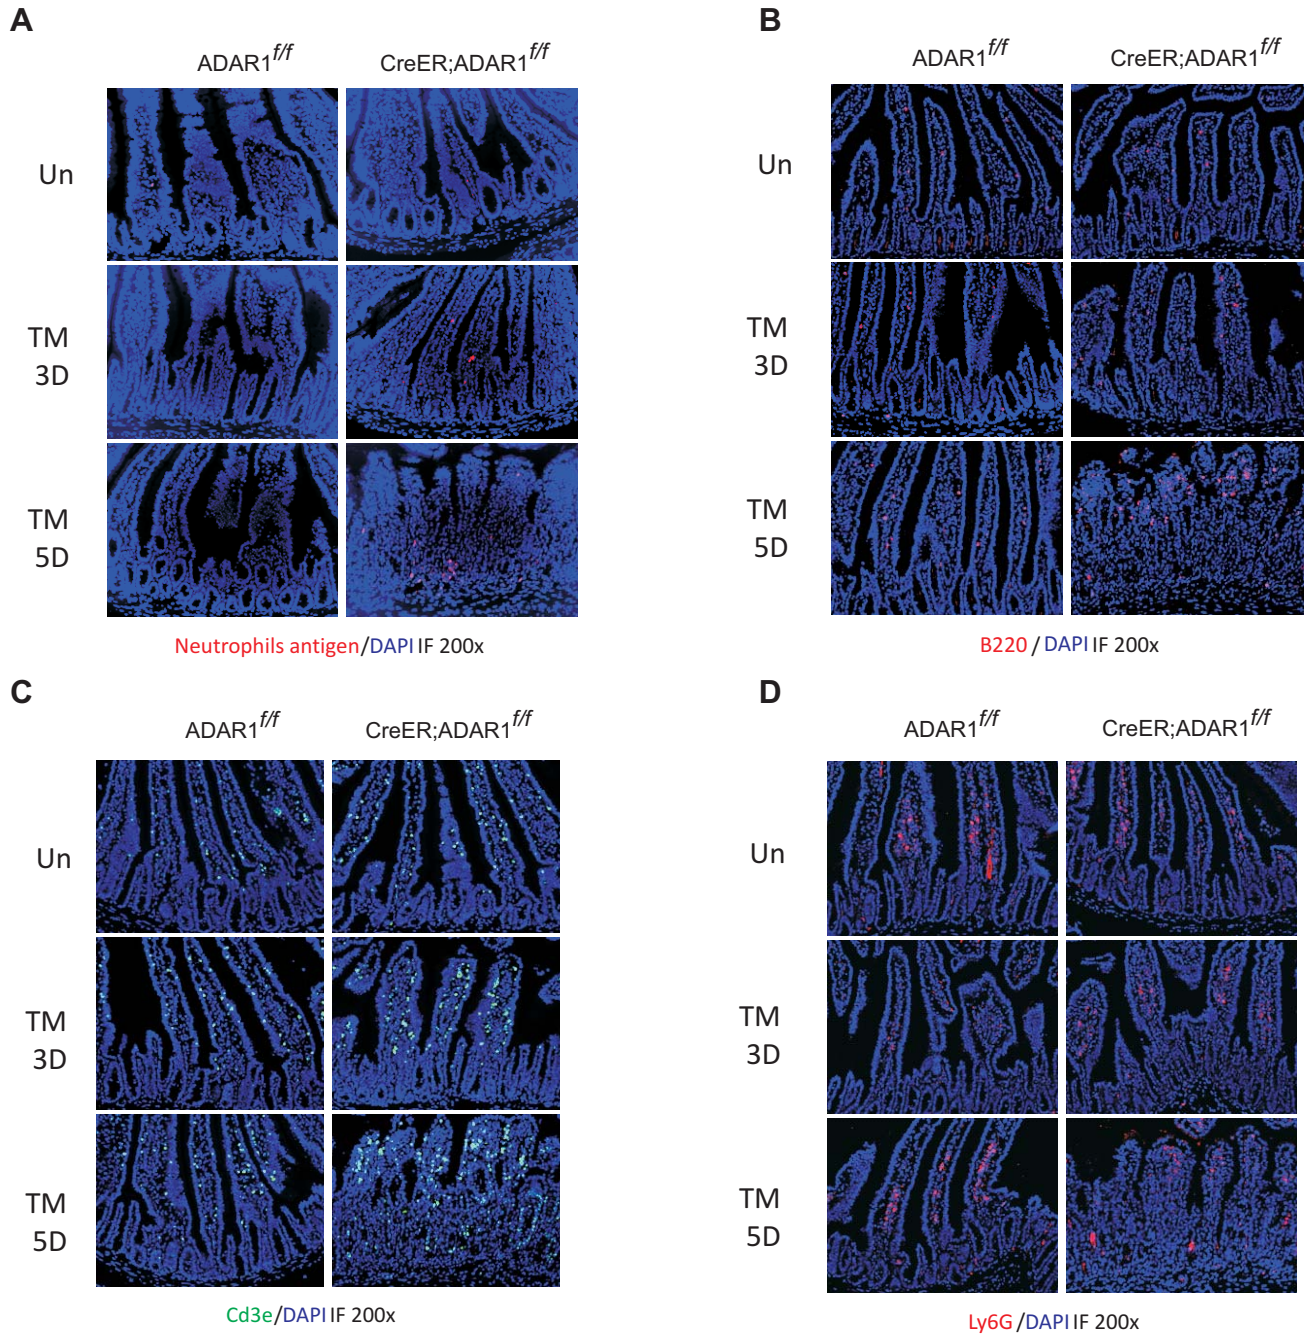



**A**

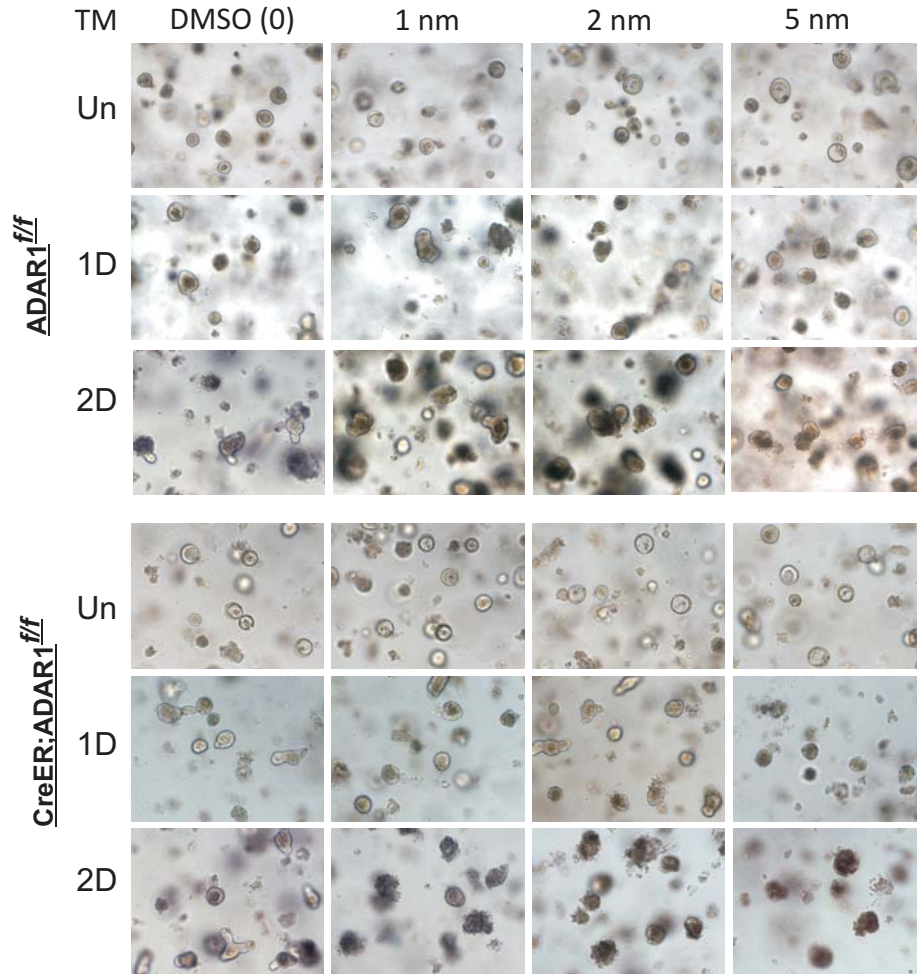

**B**

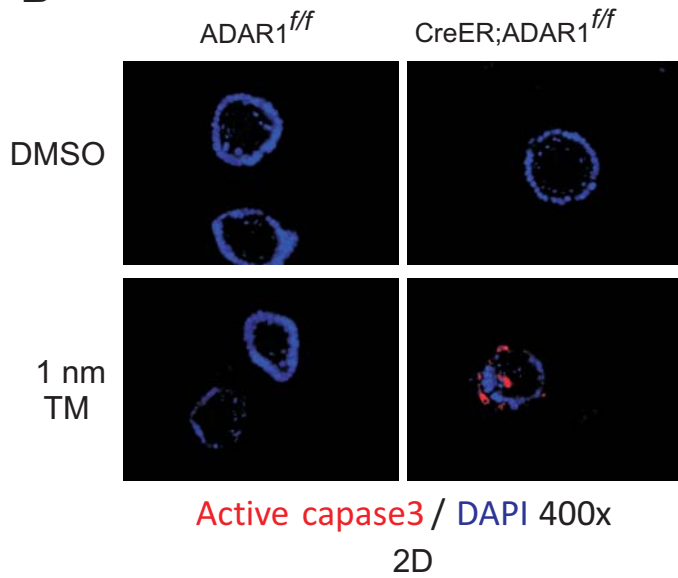

**C**

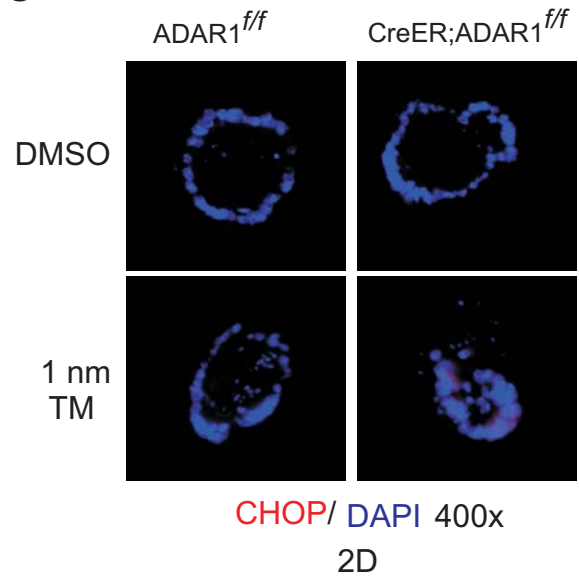

Qiu *et al.* Fig. S10, Related to Fig 6

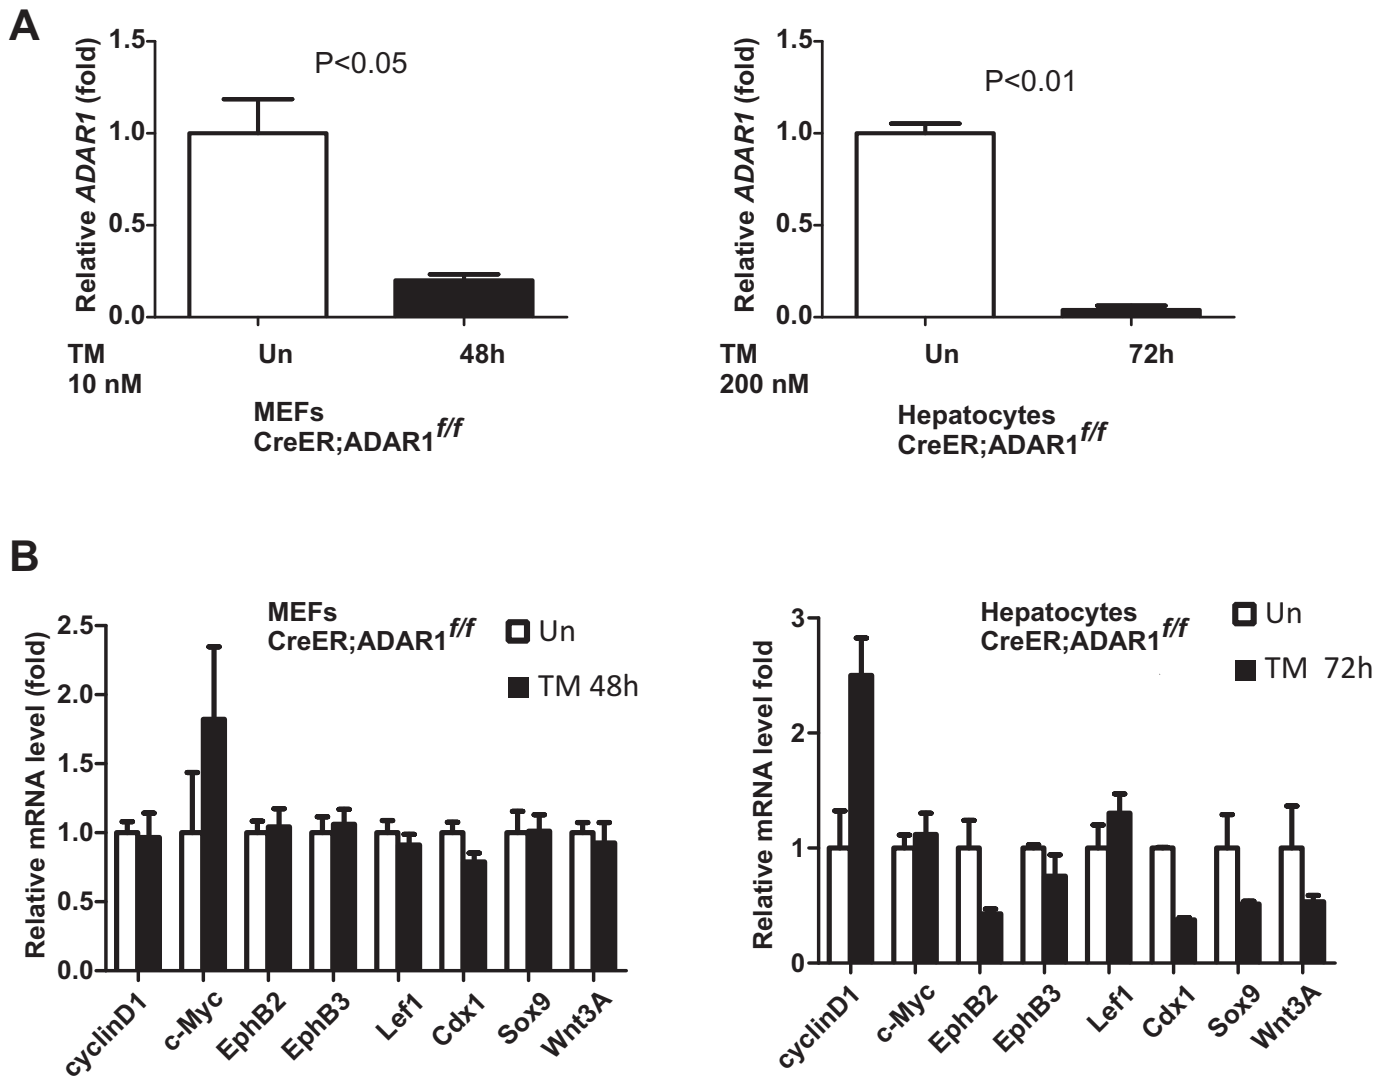

Supplement: cddis2013125x1.pdf [file cddis2013125x1.pdf]
